# Supplementary material
Source: publisher figshare collection journal article supplement (https://frontiersin.figshare.com/ndownloader/files/22333398)

**Supplemental figure 2** Scatterplot with regression line of STRATEGIES and CVA for A) the ADHD group) and B) The control group.

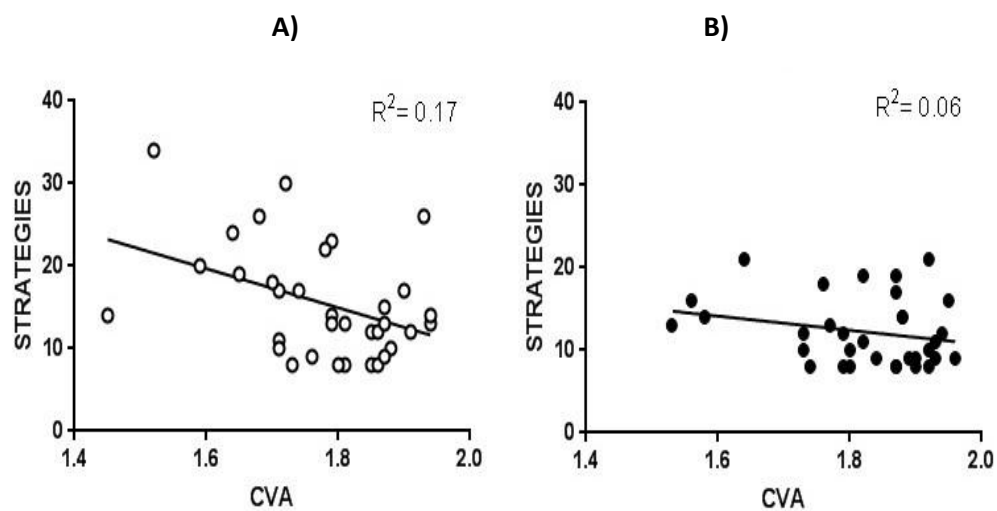

Supplement: Supplementary file [file 22333398]
